# Supplementary material for: Coupling a novel spiro-rhodamine B lactam derivative to Fe3O4nanoparticles for visual detection of free copper ions with high sensitivity and specificity
Source: Royal Society of Chemistry journal article supplement (doi:10.1039/c5ra04272k), 2015-01-01
Supplement: c5ra04272k1.pdf [file c5ra04272k1.pdf]

**Electronic supplementary information for**

**Coupling a novel spiro rhodamine B lactam derivative to Fe<sub>3</sub>O<sub>4</sub> nanoparticles for  
visual detection of free copper ion with high sensitivity and specificity**

Hongyan Zhang,<sup>ab</sup> Xiaoxue Zeng,<sup>a</sup> Danlong Chen,<sup>a</sup> Ying Guo,<sup>a</sup> Wenjing Jiang,<sup>a</sup>

Liangjun Xu,<sup>a</sup> FengFu Fu<sup>a\*</sup>

<sup>a</sup>Key Lab of Analysis and Detection for Food Safety of Ministry of Education, Fujian  
Provincial Key Lab of Analysis and Detection for Food Safety, College of Chemistry,  
Fuzhou University, Fuzhou, Fujian, 350116, China

<sup>b</sup>College of Pharmacy, Fujian University of Traditional Chinese Medicine, Fuzhou,  
Fujian, 350122, China

### ***1. Reagents and Chemicals***

Unless otherwise mentioned, all reagents were of analytical grade and were used without further purification. Rhodamine B (95 %), iron (III) acetylacetonate (98 %), dimethyl sulfoxide (DMSO, HPLC grade) and oleylamine were purchased from J&K Scientific Ltd. (Beijing, China). Hydrazine hydrate (100 %) and benzyl ether (99 %) were obtained from Acros Co., Ltd. (Beijing, China). Glyoxal (39 %), 3,4-dihydroxybenzhydrazide (97 %), and n-hexane were purchased from Aladdin Co., Ltd. (Shanghai, China). Dichloromethane and sodium acetate trihydrate were provided by Xilong Chemical Co., Ltd. (Guangdong, China). Methanol, absolute ethanol and silica gel (200 meshes) were purchased from Sinopharm Chemical Reagent Co., Ltd. (Shanghai, China). Ultrapure water (18.2 MΩ/ cm) was obtained from a Millipore Milli-Q water purification system.

### ***2. Apparatus***

UV-visible spectra were recorded with a TU-1950 spectrophotometer (Persee, China). ESI-MS (electrospray ionization mass spectrometry) data was obtained with a LCQ Fleet 100452 liquid chromatography-mass spectrometer (LC-MS, Thermo Fisher, USA). <sup>1</sup>H-NMR (nuclear magnetic resonance) spectra was recorded by a Bruker AVANCE III NMR spectrometer (Germany) with chemical shifts reported as ppm (TMS as internal standard). The transmission electron microscopic images of magnetic nanoparticles were obtained by using a Tecnai F30 Field Emission Gun Transmission Electron Microscope (TEM, Philips-FEI, Netherlands) operating at an acceleration voltage of 300 kV. Fourier transform infrared (FT-IR) spectra were recorded by a Nicolet 6700 infrared spectrometer (Thermo Fisher, USA) in the range of 350-7800 cm<sup>-1</sup> with a resolution of 4 cm<sup>-1</sup>.

### ***3. Synthesis and ESI-MS characterization of compound 1 and compound 2***

About 1.20 g of rhodamine B (2.5 mmol) was dissolved in 30 mL absolute ethanol in a 100 mL flask, then 4.0 mL of hydrazine hydrate (64%) was dropwise added under vigorous stirring at room temperature. After the addition of hydrazine hydrate, the stirred mixture was sequentially refluxed for 2 h by heating the whole. The solution became clear and its colour changed from dark purple to light orange, then the mixture was evaporated to obtain solid by using rotary evaporation under reduced pressure. The solid in the flask was dissolved with 80 mL of 1 M HCl, then 1

M NaOH solution (about 85 mL) was slowly added with stirring to adjust the pH of the solution to 9-10. The resulting precipitate was filtered and washed 3 times with 15 mL distilled water, and was dried under vacuum oven to afford compound 1 as pink solid (0.86 g, 75%).

Secondly, above 0.5 g of compound 1 (1.1 mmol) was dissolved in absolute ethanol (13 mL), and an excess of glyoxal (2.0 mL, 40 %) was added. The mixture was stirred rapidly for 8 h under the conditions of protection from light at room temperature. The resulting mixture was then added into 60 mL of saturated NaCl solution and the light red precipitate was observed immediately. The resulting precipitate was filtered and washed 3 times with cold ethanol (about 15 mL), and was dried under vacuum oven to afford compound 2 as yellow solid (0.46 g, 76%).

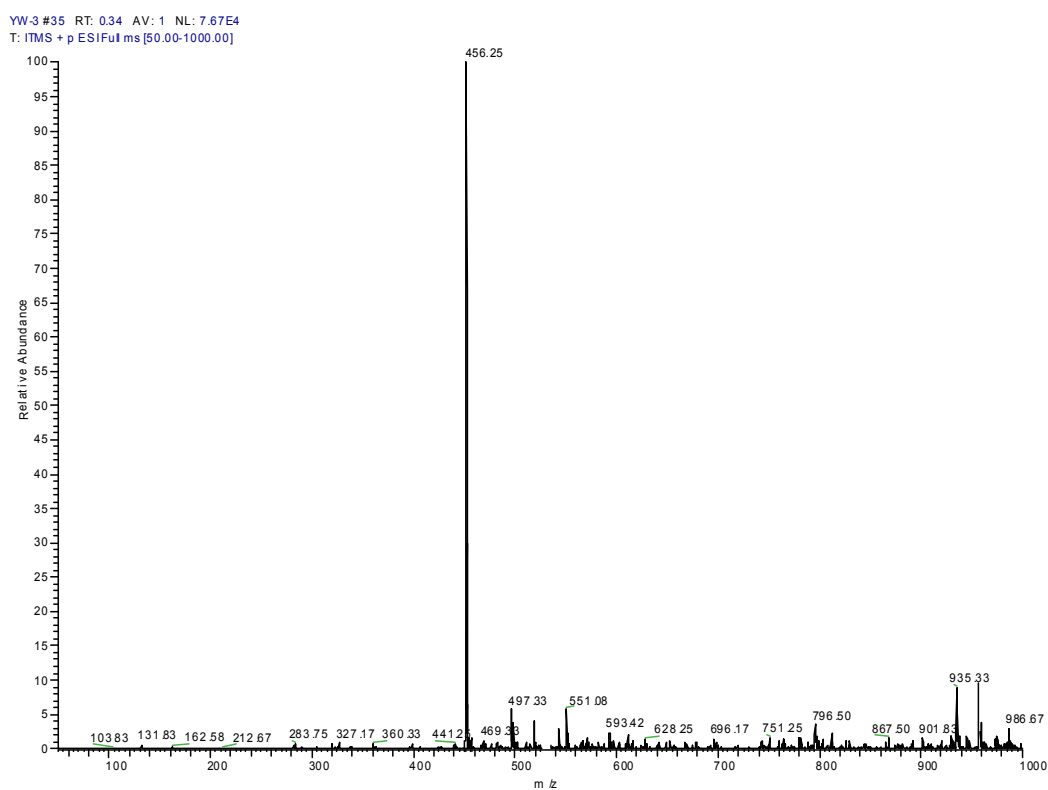

The ESI-MS analysis of compound 1

YW-4 #19 RT: 0.16 AV: 1 NL: 3.73E4  
T: ITMS + p ESI Full ms [50.00-1000.00]

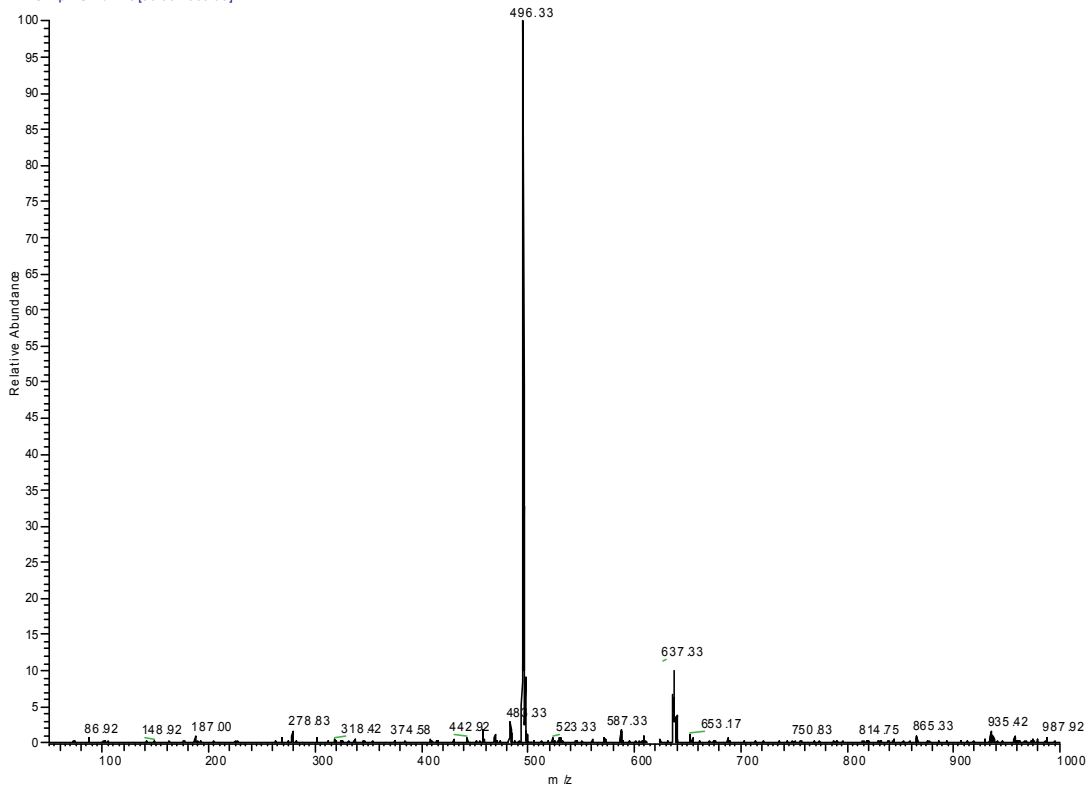

The ESI-MS analysis of compound 2



## 6. The characterization of RhBLA-functionalized magnetic $Fe_3O_4$ NPs

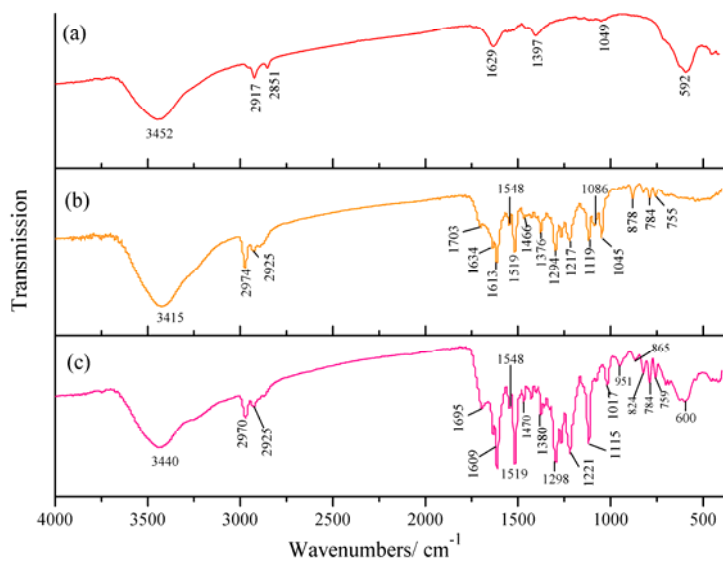

Figure S3: FT-IR analytical results. (a): pure RhBLA; (b):  $Fe_3O_4$  NPs; (c): RhBLA-functionalized  $Fe_3O_4$  NPs.

## 7. Optimization of the chelating conditions between RhBLA and $\text{Cu}^{2+}$

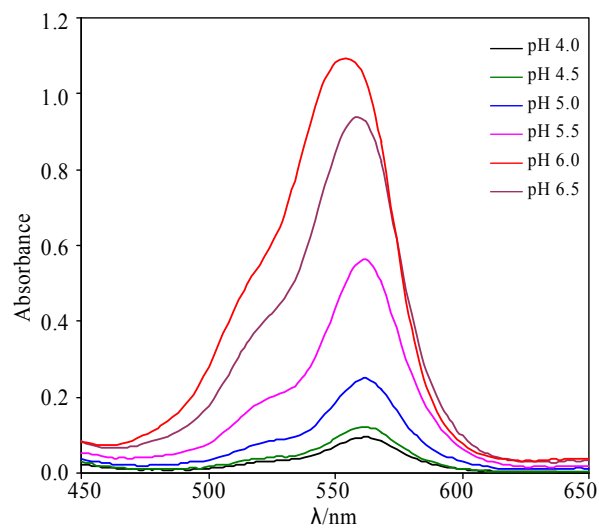

Figure S4: The effect of pH on chelation of RhBLA and  $\text{Cu}^{2+}$ .

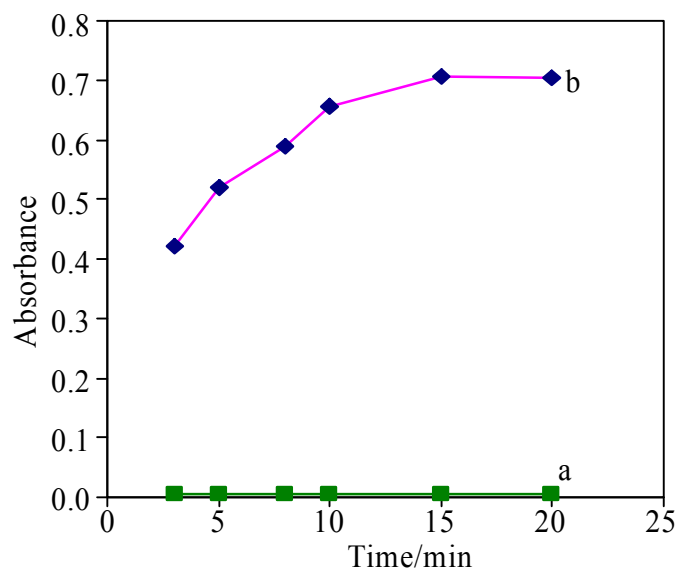

Figure S5: The effect of reaction time on chelation of RhBLA and  $\text{Cu}^{2+}$ . (a): reagent blank; (b): RhBLA-Cu<sup>2+</sup> complex.

**8. Color response of pure RhBLA to various metallic ions and different concentrations of  $\text{Cu}^{2+}$ .**

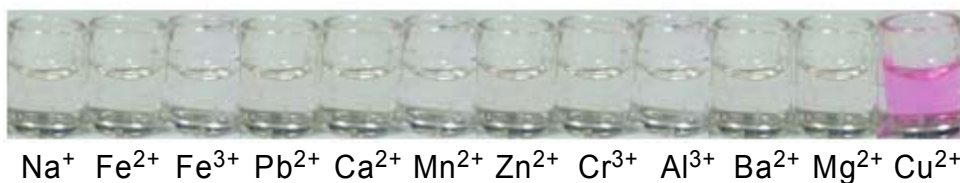

Figure S6: The photograph of pure RhBLA solution (in HAc-NaAc/methanol buffer, v/v=1/1, 50 mM, pH=6.0) in the presence of 35  $\mu\text{M}$   $\text{Cu}^{2+}$  or 50  $\mu\text{M}$  of other metal ions.

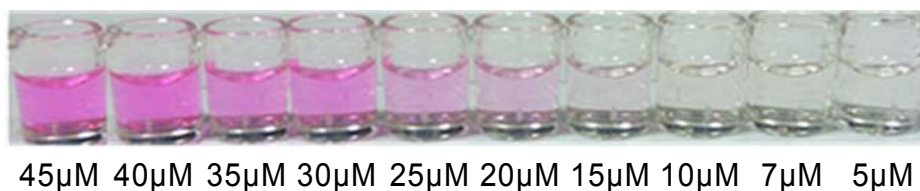

Figure S7: The photographs of pure RhBLA solution (in HAc-NaAc/methanol buffer, v/v=1/1, 50 mM, pH=6.0) in the presence of different concentrations of  $\text{Cu}^{2+}$ .



Table S1: Comparison on the sensitivity among previous visual methods for detecting Cu<sup>2+</sup> and this study.

| Assay method                                                                                                                     | Visual detection limit              | Ref.       |
|----------------------------------------------------------------------------------------------------------------------------------|-------------------------------------|------------|
| Colorimetric recognition of Cu(II) by (2-dimethylaminoethyl)amino appended anthracene-9,10-diones                                | About 5 $\mu$ M                     | [1]        |
| Visual method based on azide- and alkyne-functionalized polydiacetylene vesicles                                                 | 5 $\mu$ M                           | [2]        |
| Visual Detection of Copper(II) by Azide- and Alkyne-Functionalized Gold Nanoparticles Using Click Chemistry                      | 50 $\mu$ M                          | [3]        |
| Colorimetric Cu <sup>2+</sup> detection with a ligation DNAzyme and nanoparticles                                                | 10 $\mu$ M                          | [4]        |
| Visual detection based on phosphatidylserine-functionalized AuNPs                                                                | 30 $\mu$ M                          | [5]        |
| Method by combined Fe <sub>3</sub> O <sub>4</sub> NPs-Based Solid Phase Extraction with a Functionalized Gold Nanoparticle Probe | About 3.2 nM by using 200 mL sample | [6]        |
| Method based on spiro rhodamine B lactam derivative (RhBLA)-functionalized Fe <sub>3</sub> O <sub>4</sub> NPs                    | 50 nM by using 100 mL sample        | This study |

References:

- [1] N. Kaur and S. Kumar, *Dalton transactions* 2006, 3766.
- [2] Q.-L. Xu, K. M. Lee, F. Wang and J. Yoon, *J. Mater. Chem.* 2011, 21, 15214.
- [3] Y. Zhou, S.-X. Wang, K. Zhang and X.-Y. Jiang, *Angew. Chem. Int. Ed.* 2008, 120, 7564.
- [4] J.-W. Liu and Yi Lu, *Chem. Commun.* 2007, 4872.
- [5] W.-J. Yang, Y. He, L.-J. Xu, D.-L. Chen, M.-X. Li, H.-Y. Zhang and F.-F. Fu, *J. Mater. Chem. B* 2014, 2, 7765.
- [6] Z.-Q. Tan, J.-F. Liu and G.-B. Jiang, *Nanoscale* 2012, 4, 6735.
